# Supplementary material
Source: MDPI journal article supplement (https://www.mdpi.com/2076-3417/12/11/5742)
Supplement: s1 [file s1]

## Supplementary Information for FLOWSA: A Python package attributing resource use, waste, emissions, and other flows to industries

Catherine Birney, U.S. Environmental Protection Agency, Office of Research and Development, Center for Environmental Solutions and Emergency Response

Ben Young, Eastern Research Group, Inc.

Mo Li, GDIT

Melissa Conner, GQC

Jacob Specht, GQC

Wesley W. Ingwersen, U.S. Environmental Protection Agency, Office of Research and Development, Center for Environmental Solutions and Emergency Response

The following tables describe in detail the information captured in Flow-By-Activity (FBA) and Flow-By-Sector (FBS) tables.

### Flow-By-Activity Format Specs

| Field              | Type    | Required? | Description                                                                                                                                                                      |
|--------------------|---------|-----------|----------------------------------------------------------------------------------------------------------------------------------------------------------------------------------|
| Class              | String  | Y         | Class of the flow. See <a href="#">Flow Classes</a> .                                                                                                                            |
| SourceName         | String  | Y         | Name of data source                                                                                                                                                              |
| FlowName           | String  | Y         | ID or name of flow in its native source                                                                                                                                          |
| FlowAmount         | Numeric | Y         | The amount of a given flow in its native unit                                                                                                                                    |
| Unit               | String  | Y         | SI unit acronym. kg for mass flows; MJ for energy flows                                                                                                                          |
| FlowType           | String  | Y         | ELEMENTARY_FLOW, TECHNOSPHERE_FLOW, or WASTE_FLOW. See <a href="http://greendelta.github.io/olca-schema/FlowType.html">http://greendelta.github.io/olca-schema/FlowType.html</a> |
| ActivityProducedBy | String  | N*        | An activity defined by the source producing a flow.                                                                                                                              |
| ActivityConsumedBy | String  | N*        | An activity defined by the source receiving/consuming a flow.                                                                                                                    |
| Compartment        | String  | Y         | Name of compartment to which release goes, e.g. "air," "water," "ground."                                                                                                        |
| Location           | String  | Y         | A numeric representation of the activity location, at a national, state, or county level                                                                                         |
| LocationSystem     | String  | Y         | Description and year of the Location code, generally FIPS or ISO, e.g. FIPS_2015                                                                                                 |

|                  |         |   |                                                                                                                                                                                                                                             |
|------------------|---------|---|---------------------------------------------------------------------------------------------------------------------------------------------------------------------------------------------------------------------------------------------|
| Year             | Int     | Y | Year of data, e.g. 2010                                                                                                                                                                                                                     |
| MeasureofSpread  | String  | N | A measure of spread of a frequency distribution. Acceptable values are RSD for relative standard deviation (aka coefficient of variation) are SD for the normal (aka 'arithmetic') standard deviation, GSD for geometric standard deviation |
| Spread           | Numeric | N | The value for the given measure of spread.                                                                                                                                                                                                  |
| DistributionType | String  | N | The form of the frequency distribution, if given. Acceptable values are 'NORMAL,' 'LOGNORMAL,' 'TRIANGULAR,' 'UNIFORM.'                                                                                                                     |
| Min              | Numeric | N | The minimum FlowAmount, if provided for the data range.                                                                                                                                                                                     |
| Max              | Numeric | N | The maximum FlowAmount, if provided for the data range.                                                                                                                                                                                     |
| DataReliability  | Numeric | Y | A score of data reliability based on reporting values associated with the amount. See <a href="#">Data Quality Pedigree Matrix</a> .                                                                                                        |
| DataCollection   | Numeric | Y | A score of data collection based on reporting values associated with the amount. See <a href="#">Data Quality Pedigree Matrix</a> .                                                                                                         |
| Description      | String  | Y | Original description of the flow                                                                                                                                                                                                            |

\*At minimum, either ActivityProducedBy or ActivityConsumedBy must be present. If there is a transfer between activities, both must be present.

## Flow-By-Sector Format Specs

| Field            | Type    | Required? | Description                                                                                                                                                                                                                                 |
|------------------|---------|-----------|---------------------------------------------------------------------------------------------------------------------------------------------------------------------------------------------------------------------------------------------|
| Flowable         | String  | Y         | Name of the flow. See 'Flowable' in <a href="#">fedelemflowlist FlowList</a>                                                                                                                                                                |
| Class            | String  | Y         | Class of flow                                                                                                                                                                                                                               |
| FlowAmount       | Numeric | Y         | The amount of a flow. Uses metric reference units.                                                                                                                                                                                          |
| SectorProducedBy | String  | N*        | A valid code from the SectorSourceName system (e.g. '31' for 'NAICS_2012_Code')                                                                                                                                                             |
| SectorConsumedBy | String  | N*        | A valid code from the SectorSourceName system                                                                                                                                                                                               |
| SectorSourceName | String  | Y         | By default, NAICS_2012_Code. Must be the same for SectorProducedBy and SectorConsumedBy.                                                                                                                                                    |
| Context          | String  | Y         | Full context for the flow, e.g. "air," "water," "ground."                                                                                                                                                                                   |
| Location         | String  | Y         | A numeric representation of the activity location, at a national, state, or county level                                                                                                                                                    |
| LocationSystem   | String  | Y         | Description and year of the Location code, generally FIPS or ISO, e.g. FIPS_2015                                                                                                                                                            |
| Unit             | String  | Y         | SI unit acronym. 'kg' for mass flows; 'MJ' for energy flows.                                                                                                                                                                                |
| FlowType         | String  | Y         | ELEMENTARY_FLOW, TECHNOSPHERE_FLOW, or WASTE_FLOW. See <a href="http://greendelta.github.io/olca-schema/FlowType.html">http://greendelta.github.io/olca-schema/FlowType.html</a>                                                            |
| Year             | Int     | Y         | Year of data, e.g. 2010                                                                                                                                                                                                                     |
| MeasureofSpread  | String  | N         | A measure of spread of a frequency distribution. Acceptable values are RSD for relative standard deviation (aka coefficient of variation) are SD for the normal (aka 'arithmetic') standard deviation, GSD for geometric standard deviation |
| Spread           | Numeric | N         | The value for the given measure of spread.                                                                                                                                                                                                  |
| DistributionType | String  | N         | The form of the frequency distribution, if given. Acceptable values are 'NORMAL,' 'LOGNORMAL,' 'TRIANGULAR,'                                                                                                                                |

| ‘UNIFORM.’               |         |   |                                                                                                                                         |
|--------------------------|---------|---|-----------------------------------------------------------------------------------------------------------------------------------------|
| Min                      | Numeric | N | The minimum FlowAmount, if provided for the data range.                                                                                 |
| Max                      | Numeric | N | The maximum FlowAmount, if provided for the data range.                                                                                 |
| DataReliability          | Numeric | Y | A score of data reliability based on reporting values associated with the amount. See <a href="#">Data Quality Pedigree Matrix</a> .    |
| TemporalCorrelation      | Numeric | Y | A 1-5 score of data collection based on reporting values associated with the amount. See <a href="#">Data Quality Pedigree Matrix</a> . |
| GeographicalCorrelation  | Numeric | Y | A 1-5 score of data collection based on reporting values associated with the amount. See <a href="#">Data Quality Pedigree Matrix</a> . |
| TechnologicalCorrelation | Numeric | Y | A 1-5 score of data collection based on reporting values associated with the amount. See <a href="#">Data Quality Pedigree Matrix</a> . |
| DataCollection           | Numeric | Y | A 1-5 score of data collection based on reporting values associated with the amount. See <a href="#">Data Quality Pedigree Matrix</a> . |
| MetaSources              | String  | Y | The major data source(s) value is based on, usually a FlowByActivity set.                                                               |
| FlowUUID                 | String  | Y | UUID from Federal Commons Flow List.                                                                                                    |

- At minimum, either SectorProducedBy or SectorConsumedBy must be present. If there is a transfer between sectors, both must be present.
